# Supplementary material for: Effect of substituents at the heteroatom on the structure and ligating properties of heterocyclic carbene, silylene, germylene and abnormal carbene: A theoretical study
Source: Royal Society of Chemistry journal article supplement (doi:10.1039/c003266b), 2010-01-01
Supplement: c003266b.pdf [file c003266b.pdf]

# Supporting Information

## **Effect of Substituents at the Heteroatom on the Structure and Ligating Properties of N-Heterocyclic Carbene, Silylene, Germylene and Abnormal Carbene: A Theoretical study**

Ankur Kanti Guha, Satyajit Sarmah and Ashwini K. Phukan\*

*Department of Chemical Sciences*

*Tezpur University*

*Napaam 784028, Assam, India*

Phone: (+91)-3712-267008 Extn. 5060

Fax: (+91)-3712-267005/267006

E-mail: [ashwini@tezu.ernet.in](mailto:ashwini@tezu.ernet.in)

**Cartesian coordinates of the optimized geometries of the systems 1 – 6 along with the total energies including zero point vibrational energies (in a. u) of the respective molecules.**

1. **1** (R = H), T. E. = -226.11260

6 0.000000 -1.279186 -0.000054

7 -1.052041 -0.403598 -0.000211

6 -0.679203 0.939260 0.000024

6 0.679203 0.939260 0.000027

7 1.052041 -0.403598 -0.000212

1 -2.008034 -0.727390 0.001433

1 -1.386940 1.754574 0.000053

1 1.386940 1.754575 0.000057

1 2.008034 -0.727390 0.001430

2. **1** (R = F), T. E. = -424.45331

6 0.000010 -1.038098 0.000214

7 -1.003969 -0.151932 0.000078

6 -0.683975 1.192066 -0.000061

6 0.683998 1.192051 -0.000008

7 1.003957 -0.151940 0.000466

1 -1.414032 1.985993 -0.000518

1 1.414034 1.985998 0.000447

9 2.321784 -0.551168 -0.000359

9 -2.321796 -0.551166 -0.000153

3. **1** (R = Cl), T. E. = -1145.22636

6 -0.000077 -0.854006 0.000000

7 -0.000021 0.028543 1.034787  
6 -0.000021 1.377544 0.678995  
6 -0.000021 1.377544 -0.678995  
7 -0.000021 0.028543 -1.034787  
17 0.000021 -0.475548 2.678554  
1 0.000148 2.181264 1.398644  
1 0.000148 2.181264 -1.398644  
17 0.000021 -0.475548 -2.678554

4. **1** (R = OH), T. E. = -376.43231

6 -0.000033 -0.988366 0.000026  
7 -1.030907 -0.115015 0.000013  
6 -0.685566 1.217120 0.000025  
6 0.685692 1.217041 0.000053  
7 1.030879 -0.115081 -0.000062  
1 -1.409278 2.016648 -0.000044  
1 1.409471 2.016524 -0.000040  
8 -2.363696 -0.508095 -0.000115  
1 -2.299635 -1.483640 0.000744  
8 2.363657 -0.508147 0.000041  
1 2.299392 -1.483681 -0.000352

5. **1** (R = NH<sub>2</sub>), T. E. = -336.71582

6 -0.036867 -1.008626 0.000035  
7 -1.060399 -0.104858 -0.000025  
6 -0.654541 1.223633 -0.000041  
6 0.702870 1.185721 0.000091  
7 1.041576 -0.172802 -0.000004

1 -1.358301 2.041939 -0.000235

1 1.440024 1.975504 0.000006

7 -2.432823 -0.441860 -0.000011

1 -2.594603 -1.030320 -0.816790

1 -2.594693 -1.029977 0.817018

7 2.359710 -0.667806 -0.000014

1 2.841146 -0.325188 -0.829615

1 2.841213 -0.325037 0.829485

6. **1** (R = PH<sub>2</sub>), T. E. = -909.98383

6 -0.000345 -0.790836 0.000000

7 -0.000045 0.073695 1.071416

6 0.000339 1.422080 0.676244

6 0.000339 1.422080 -0.676244

7 -0.000045 0.073695 -1.071416

1 0.000633 2.237823 1.384031

1 0.000633 2.237823 -1.384031

15 -0.000045 -0.410376 2.773071

15 -0.000045 -0.410376 -2.773071

1 1.034262 -1.379316 -2.683532

1 -1.034912 -1.378714 -2.683630

1 -1.034912 -1.378714 2.683630

1 1.034262 -1.379316 2.683532

7. **1** (R = CH<sub>3</sub>), T. E. = -304.68218

6 -0.001160 -0.983199 0.000000

7 -0.000301 -0.122356 1.065346

6 0.001057 1.214495 0.679600  
6 0.001057 1.214495 -0.679600  
7 -0.000301 -0.122356 -1.065346  
1 0.001947 2.033770 1.384435  
1 0.001947 2.033770 -1.384435  
6 -0.000301 -0.571485 -2.449283  
1 -0.891962 -0.210251 -2.974391  
1 0.893241 -0.213363 -2.973348  
1 -0.002180 -1.662126 -2.442093  
6 -0.000301 -0.571485 2.449283  
1 -0.002180 -1.662126 2.442093  
1 0.893241 -0.213363 2.973348  
1 -0.891962 -0.210251 2.974391

8. **1** (R = Ph), T. E. = -688.06701

6 0.351847 -0.078836 0.000000  
7 -0.472556 0.172474 1.068423  
6 -1.756346 0.566829 0.676819  
6 -1.756346 0.566829 -0.676819  
7 -0.472556 0.172474 -1.068423  
1 -2.527817 0.852612 1.374846  
1 -2.527817 0.852612 -1.374846  
6 -0.056469 0.022805 2.425853  
6 1.282831 0.242670 2.768845  
6 1.688165 0.096911 4.095481  
6 0.767817 -0.258083 5.087322  
6 -0.566289 -0.478395 4.738289

6 -0.980221 -0.346197 3.410315  
1 1.986640 0.516032 1.990863  
1 2.729499 0.268998 4.355363  
1 1.088665 -0.365196 6.120012  
1 -1.289736 -0.767869 5.496064  
1 -2.011822 -0.554618 3.142671  
6 -0.056469 0.022805 -2.425853  
6 -0.980221 -0.346197 -3.410315  
6 -0.566289 -0.478395 -4.738289  
6 0.767817 -0.258083 -5.087322  
6 1.688165 0.096911 -4.095481  
6 1.282831 0.242670 -2.768845  
1 -2.011822 -0.554618 -3.142671  
1 -1.289736 -0.767869 -5.496064  
1 1.088665 -0.365196 -6.120012  
1 2.729499 0.268998 -4.355363  
1 1.986640 0.516032 -1.990863

9. **1** (R = <sup>t</sup>Bu), T. E. = -540.40593

6 0.560586 -0.000265 0.000000  
7 -0.288745 -0.000249 1.071894  
6 -1.625942 -0.000090 0.679390  
6 -1.625942 -0.000090 -0.679390  
7 -0.288745 -0.000249 -1.071894  
1 -2.459373 -0.000056 1.363090  
1 -2.459373 -0.000056 -1.363090  
6 0.221850 0.000010 2.476121

|     |                                      |           |           |
|-----|--------------------------------------|-----------|-----------|
| 6   | 0.221850                             | 0.000010  | -2.476121 |
| 6   | -0.950377                            | -0.000874 | 3.468213  |
| 1   | -0.551085                            | -0.000914 | 4.487753  |
| 1   | -1.579292                            | 0.890307  | 3.359540  |
| 1   | -1.578324                            | -0.892680 | 3.359064  |
| 6   | 1.076984                             | -1.263180 | 2.684255  |
| 1   | 1.486290                             | -1.278674 | 3.701664  |
| 1   | 0.474177                             | -2.167807 | 2.540575  |
| 1   | 1.903343                             | -1.284254 | 1.968712  |
| 6   | 1.075227                             | 1.264374  | 2.684397  |
| 1   | 0.471237                             | 2.168185  | 2.540544  |
| 1   | 1.484323                             | 1.280493  | 3.701882  |
| 1   | 1.901713                             | 1.286492  | 1.969021  |
| 6   | 1.075227                             | 1.264374  | -2.684397 |
| 1   | 1.484323                             | 1.280493  | -3.701882 |
| 1   | 0.471237                             | 2.168185  | -2.540544 |
| 1   | 1.901713                             | 1.286492  | -1.969021 |
| 6   | 1.076984                             | -1.263180 | -2.684255 |
| 1   | 1.903343                             | -1.284254 | -1.968712 |
| 1   | 0.474177                             | -2.167807 | -2.540575 |
| 1   | 1.486290                             | -1.278674 | -3.701664 |
| 6   | -0.950377                            | -0.000874 | -3.468213 |
| 1   | -1.578324                            | -0.892680 | -3.359064 |
| 1   | -1.579292                            | 0.890307  | -3.359540 |
| 1   | -0.551085                            | -0.000914 | -4.487753 |
| 10. | <b>2</b> (R = H), T. E. = -242.15972 |           |           |

7 1.090569 -0.107662 -0.000110  
6 0.327041 -1.219552 0.000000  
7 -0.915807 -0.626636 0.000152  
6 -0.815804 0.748696 -0.000082  
7 0.434051 1.112028 -0.000074  
1 2.100214 -0.096026 0.000731  
1 -1.776714 -1.154799 -0.000624  
1 -1.652607 1.431839 0.000611

11. **2** (R = F), T. E. = -440.49348

7 0.988381 -0.144415 -0.000658  
6 0.010789 -1.052950 0.000108  
7 -0.996911 -0.150933 0.000302  
6 -0.604220 1.160435 0.000034  
7 0.707905 1.178535 0.000000  
1 -1.257713 2.019038 0.000333  
9 2.308572 -0.470265 0.000246  
9 -2.317163 -0.512653 -0.000100

12. **2** (R = Cl), T. E. = -1161.26923

7 -1.019326 0.006686 -0.000089  
6 -0.006830 -0.885645 0.000401  
7 1.028127 0.015942 0.000221  
6 0.593753 1.326473 -0.000118  
7 -0.707789 1.351817 0.000152  
1 1.238448 2.192553 0.000014  
17 -2.673594 -0.416575 -0.000098



17 2.681413 -0.433933 -0.000120

13. **2** (R = OH), T. E. = -392.47481

7 -1.010526 -0.146504 -0.004822

6 0.017621 -1.019468 -0.004839

7 1.027024 -0.113230 0.004519

6 0.592761 1.182352 0.002283

7 -0.718404 1.188876 -0.008342

1 1.231650 2.052272 0.006726

8 -2.330658 -0.509628 -0.101263

8 2.372495 -0.441520 0.012966

1 -2.672107 -0.506003 0.812561

1 2.356806 -1.418380 -0.037058

14. **2** (R = NH<sub>2</sub>), T. E. = -352.76817

7 -1.024287 -0.182938 0.000077

6 0.028251 -1.026724 0.000028

7 1.049946 -0.107475 -0.000060

6 0.572606 1.181650 -0.000042

7 -0.729259 1.180092 0.000046

1 1.205123 2.057544 -0.000153

7 -2.359855 -0.592591 -0.000031

7 2.430330 -0.391666 -0.000030

1 -2.808623 -0.193540 0.823647

1 2.619421 -0.968619 0.818927

1 -2.808470 -0.193600 -0.823825

1 2.619277 -0.969291 -0.818525

15. **2** (R = PH<sub>2</sub>), T. E. = -926.03191

7 -1.050097 0.005035 -0.000099

6 0.000318 -0.853261 -0.000068

7 1.065575 0.031328 0.000030

6 0.586788 1.335770 0.000083

7 -0.708094 1.367768 -0.000021

1 1.217491 2.214235 0.000008

15 -2.734956 -0.534433 0.000004

15 2.737529 -0.549894 -0.000088

1 -3.171045 0.345695 1.030609

1 3.206032 0.318218 -1.030331

1 -3.171364 0.346163 -1.030048

1 3.205970 0.316635 1.031557

16. **2** (R = CH<sub>3</sub>), T. E. = -320.73193

7 -1.041748 -0.136517 0.000015

6 -0.003491 -1.000956 -0.000030

7 1.057195 -0.120903 -0.000068

6 0.594940 1.174921 0.000043

7 -0.707746 1.207247 0.000020

1 1.225992 2.053102 -0.000229

6 -2.450473 -0.492073 -0.000004

6 2.457689 -0.522164 0.000035

1 -2.938831 -0.088256 0.891978

1 2.967728 -0.146125 0.893112

1 -2.939113 -0.086830 -0.891161

1 2.486035 -1.612163 0.000307

1 -2.515443 -1.580292 -0.000809

1 2.967731 -0.146589 -0.893237

17. **2** (R = Ph), T. E. = -704.11644

6 0.001770 0.448151 0.075016

7 -1.048248 -0.397352 -0.058996

7 -0.716419 -1.729757 -0.279657

6 0.581300 -1.707807 -0.278379

7 1.057301 -0.426235 -0.066556

1 1.202489 -2.574616 -0.448304

6 -2.429132 -0.031295 0.007944

6 -2.776471 1.304398 0.242686

6 -4.123720 1.659984 0.305131

6 -5.124246 0.697377 0.136295

6 -4.763897 -0.631853 -0.096190

6 -3.419054 -1.004226 -0.161577

1 -1.993211 2.042086 0.373506

1 -4.390132 2.697819 0.487959

1 -6.172122 0.981098 0.186103

1 -5.530845 -1.390596 -0.228903

1 -3.135237 -2.034043 -0.341991

6 2.434722 -0.050438 -0.012279

6 3.385693 -0.941691 0.495661

6 4.732488 -0.571414 0.526909

6 5.128756 0.687547 0.069918

6 4.168225 1.577625 -0.421190

6 2.822377 1.213209 -0.469622

1 3.079802 -1.907693 0.887060  
1 5.467836 -1.266204 0.923729  
1 6.176174 0.974951 0.100555  
1 4.466686 2.560469 -0.776101  
1 2.067251 1.892734 -0.849093

18. **2** (R = <sup>t</sup>Bu), T. E. = -556.45940

6 -0.015183 0.665204 0.000131  
7 1.043693 -0.168705 -0.000085  
7 0.731196 -1.520503 -0.000098  
6 -0.571212 -1.515134 0.000112  
7 -1.064886 -0.229675 0.000309  
1 -1.167797 -2.414078 0.000240  
6 2.485170 0.201134 -0.000026  
6 -2.495054 0.197547 -0.000006  
6 3.135198 -0.388004 1.265447  
1 4.202713 -0.140636 1.284861  
1 2.669661 0.026235 2.167215  
1 3.029527 -1.476599 1.288845  
6 2.613380 1.729130 -0.000201  
1 2.141890 2.170421 0.882386  
1 3.678177 1.990365 0.000189  
1 2.142581 2.170173 -0.883251  
6 3.135614 -0.388315 -1.265152  
1 4.203053 -0.140632 -1.284235  
1 3.030271 -1.476951 -1.288171  
1 2.670267 0.025545 -2.167183

6 -2.749233 1.037408 1.264406  
1 -3.787648 1.388979 1.278868  
1 -2.573650 0.442751 2.168633  
1 -2.082317 1.903621 1.287527  
6 -3.409164 -1.036518 -0.000591  
1 -3.259066 -1.656411 -0.892183  
1 -3.260323 -1.656372 0.891243  
1 -4.452191 -0.704256 -0.001298  
6 -2.748532 1.037978 -1.264189  
1 -2.081786 1.904344 -1.286518  
1 -2.572271 0.443773 -2.168568  
1 -3.787012 1.389323 -1.279062

19. **3** (R = H), T. E. = -815.30367

15 -1.307243 -0.348290 -0.121370  
6 0.036573 -1.427412 0.007692  
15 1.339179 -0.317339 0.104504  
6 0.537280 1.346985 -0.052776  
7 -0.741953 1.319269 0.061555  
1 1.085974 2.288882 -0.060647  
1 -2.242215 -0.524167 0.920174  
1 2.427761 -0.532598 -0.766927

20. **3** (R = F), T. E. = -1013.84805

15 1.248923 -0.239032 0.477694  
6 -0.027988 -1.331003 0.061186  
15 -1.205672 -0.217295 -0.334526

6 -0.500723 1.530161 -0.040447

7 0.756477 1.504961 0.066512

1 -1.098066 2.431463 -0.164149

9 2.538063 -0.428795 -0.478319

9 -2.724038 -0.384119 0.192387

21. **3** (R = Cl), T. E. = -1734.55182

15 1.225928 -0.099245 0.654429

6 -0.006842 -1.213282 0.163663

15 -1.161939 -0.133182 -0.416617

6 -0.476250 1.613710 -0.129023

7 0.758366 1.610817 0.146004

1 -1.051867 2.509245 -0.358246

17 3.016161 -0.399428 -0.331874

17 -3.152513 -0.347696 0.070768

22. **3** (R = OH), T. E. = -965.77003

15 1.266103 -0.233626 0.479319

6 -0.043622 -1.292687 0.068197

15 -1.221223 -0.181492 -0.327087

6 -0.502402 1.542267 -0.037196

7 0.756917 1.504946 0.084422

1 -1.085996 2.453443 -0.158012

8 2.542637 -0.510944 -0.536309

8 -2.798367 -0.352185 0.108904

1 3.383046 -0.215910 -0.148162

1 -2.946702 -1.137823 0.664978

23. **3** (R = NH<sub>2</sub>), T. E. = -926.00474

15 -1.277754 -0.198912 -0.463027

6 0.019793 -1.267410 -0.054467

15 1.252932 -0.177277 0.348095

6 0.519007 1.518750 0.062028

7 -0.748309 1.509140 -0.072815

1 1.095641 2.436446 0.182334

7 -2.704175 -0.564011 0.368436

7 2.850834 -0.373763 -0.204137

1 -2.682073 -0.599629 1.382918

1 3.523143 -0.659567 0.500676

1 -3.545725 -0.116587 0.022952

1 2.960089 -0.925447 -1.050658

24. **3** (R = PH<sub>2</sub>), T. E. = -1499.20992

15 -1.235715 -0.048041 -0.644064

6 -0.008311 -1.155134 -0.140128

15 1.195067 -0.097587 0.479233

6 0.486862 1.592806 0.176624

7 -0.745666 1.605312 -0.181393

1 1.017130 2.514049 0.422030

15 -3.195961 -0.551972 0.261745

15 3.328748 -0.273230 -0.111560

1 -2.952303 0.060189 1.524400

1 3.636768 -1.318364 0.800725

1 -3.849879 0.594740 -0.269658

1 3.114575 -1.151373 -1.207034

25. **3** (R = CH<sub>3</sub>), T. E. = -893.90011

15 -1.257425 -0.200463 -0.487363

6 0.022502 -1.275793 -0.061444

15 1.246867 -0.174839 0.371848

6 0.503265 1.488559 0.091727

7 -0.766410 1.459391 -0.127762

1 1.026805 2.431551 0.253788

6 -2.849851 -0.461801 0.403501

6 2.988751 -0.420532 -0.182270

1 -2.726677 -0.322695 1.481239

1 3.645754 0.289298 0.329407

1 -3.592477 0.246484 0.026017

1 3.287207 -1.437438 0.087443

1 -3.188058 -1.482259 0.204486

1 3.082686 -0.293753 -1.264409

26. **3** (R = Ph), T. E. = -1277.27486

6 -0.008831 -0.908659 0.178106

15 1.155515 0.069889 -0.587735

7 0.717937 1.765143 -0.492393

6 -0.509149 1.842207 -0.096393

15 -1.179668 0.271145 0.606329

1 -1.019218 2.803933 -0.041812

6 2.910546 -0.120724 -0.181108

6 3.380751 -1.350881 0.307892

6 4.743693 -1.523302 0.554338

6 5.642307 -0.478304 0.316812



6 5.173457 0.744832 -0.171419  
6 3.812821 0.927548 -0.427340  
1 2.680706 -2.157536 0.504783  
1 5.101934 -2.474255 0.940197  
1 6.702349 -0.616132 0.513521  
1 5.866870 1.561864 -0.353618  
1 3.450580 1.880128 -0.801829  
6 -2.933235 -0.056474 0.246102  
6 -3.917980 0.826336 0.720579  
6 -5.266582 0.577707 0.458943  
6 -5.643606 -0.563879 -0.254974  
6 -4.666934 -1.454097 -0.711250  
6 -3.314630 -1.203662 -0.468846  
1 -3.636053 1.703130 1.299233  
1 -6.022103 1.269209 0.822850  
1 -6.694435 -0.760545 -0.450821  
1 -4.955977 -2.343817 -1.264797  
1 -2.553682 -1.889367 -0.828517

27. **3** (R = <sup>t</sup>Bu), T. E. = -1129.61603

6 0.002364 1.038188 -0.095962  
15 -1.230832 -0.041715 -0.612688  
7 -0.765125 -1.692781 -0.198457  
6 0.482849 -1.712880 0.130466  
15 1.202066 -0.045051 0.458829  
1 0.984497 -2.655809 0.351029  
6 -2.963929 0.239727 0.070160

|     |            |           |            |
|-----|------------|-----------|------------|
| 6   | 3.006626   | 0.223666  | -0.020500  |
| 6   | -3.905179  | -0.796685 | -0.574357  |
| 1   | -4.924060  | -0.643095 | -0.193953  |
| 1   | -3.935062  | -0.693839 | -1.665187  |
| 1   | -3.602690  | -1.821080 | -0.334882  |
| 6   | -3.385774  | 1.668465  | -0.321956  |
| 1   | -3.407300  | 1.802355  | -1.409644  |
| 1   | -4.397154  | 1.860160  | 0.060891   |
| 1   | -2.710008  | 2.418640  | 0.100550   |
| 6   | -2.962366  | 0.082668  | 1.602751   |
| 1   | -3.980819  | 0.242301  | 1.984828   |
| 1   | -2.642497  | -0.920394 | 1.904373   |
| 1   | -2.301985  | 0.815657  | 2.077766   |
| 6   | 3.158762   | 0.146967  | -1.552037  |
| 1   | 4.211693   | 0.309183  | -1.823463  |
| 1   | 2.858868   | -0.832162 | -1.942349  |
| 1   | 2.555026   | 0.912658  | -2.049292  |
| 6   | 3.856672   | -0.866195 | 0.660752   |
| 1   | 3.756225   | -0.840483 | 1.751803   |
| 1   | 3.591137   | -1.871584 | 0.313328   |
| 1   | 4.915162   | -0.704465 | 0.417731   |
| 6   | 3.414885   | 1.619772  | 0.487418   |
| 1   | 2.781899   | 2.402581  | 0.057741   |
| 1   | 3.349936   | 1.688920  | 1.579128   |
| 1   | 4.455032   | 1.819268  | 0.196290   |
| 28. | 4 (R = H), | T. E. =   | -477.58064 |

14 1.340051 0.000000 -0.000002  
7 0.027154 1.200933 -0.000057  
6 -1.262468 0.679820 0.000019  
6 -1.262468 -0.679821 0.000017  
7 0.027155 -1.200932 -0.000056  
1 0.138104 2.207450 0.000358  
1 -2.133734 1.322858 -0.000054  
1 -2.133734 -1.322858 -0.000058  
1 0.138104 -2.207450 0.000361

29. 4 (R = F), T. E. = -675.92213

14 0.000000 -1.356777 -0.000447  
7 -1.140705 0.036712 -0.000543  
6 -0.682741 1.334476 -0.000256  
6 0.682741 1.334476 -0.000256  
7 1.140705 0.036712 -0.000543  
9 -2.530242 -0.104718 0.000997  
1 -1.360369 2.176059 -0.000512  
1 1.360369 2.176059 -0.000513  
9 2.530242 -0.104718 0.000997

30. 4 (R = Cl), T. E. = -1396.70045

14 0.008808 -1.277344 0.000000  
7 0.000108 0.079815 1.184239  
6 -0.008440 1.375287 0.679489  
6 -0.008440 1.375287 -0.679489  
7 0.000108 0.079815 -1.184239

17 0.000108 -0.123884 2.903998  
1 -0.013610 2.237015 1.332518  
1 -0.013610 2.237015 -1.332518  
17 0.000108 -0.123884 -2.903998

31. 4 (R = OH), T. E. = -627.88948

14 0.000014 -1.320232 -0.000013  
7 1.174805 0.033325 -0.002231  
6 0.681241 1.326130 -0.008548  
6 -0.681248 1.326142 0.008558  
7 -1.174847 0.033345 0.002010  
8 2.573170 -0.116026 -0.108678  
1 1.351102 2.175047 -0.033771  
1 -1.351190 2.174999 0.033730  
8 -2.573121 -0.116049 0.108860  
1 -2.893663 -0.195297 -0.807534  
1 2.893502 -0.195223 0.807787

32. 4 (R = NH<sub>2</sub>), T. E. = -588.17647

14 0.015430 -1.289619 0.000086  
7 1.203353 0.057174 -0.000002  
6 0.658710 1.331640 -0.000041  
6 -0.701517 1.310351 0.000000  
7 -1.199592 0.008945 0.000000  
7 2.630035 -0.014014 -0.000226  
1 1.310510 2.195828 -0.000019  
1 -1.370190 2.163342 0.000086

7 -2.594613 -0.255474 -0.000039  
1 -3.015409 0.170400 0.826008  
1 2.928685 -0.535486 0.822338  
1 -3.015384 0.170244 -0.826175  
1 2.928326 -0.538023 -0.821323

33. 4 (R = PH<sub>2</sub>), T. E. = -1161.45344

14 -0.004894 -1.211970 -0.000004  
7 -1.232634 0.096882 -0.000035  
6 -0.663064 1.377622 -0.000031  
6 0.691532 1.369401 0.000002  
7 1.234456 0.077791 0.000012  
15 -2.989455 -0.029448 -0.000064  
1 -1.291659 2.261230 -0.000061  
1 1.332743 2.242852 0.000005  
15 2.950556 -0.270606 0.000017  
1 3.353939 0.626790 -1.035359  
1 -3.140133 -0.997829 -1.033488  
1 3.353941 0.626894 1.035298  
1 -3.140386 -0.996388 1.034690

34. 4 (R = CH<sub>3</sub>), T. E. = -556.14156

14 0.000000 -1.265963 -0.000002  
7 -1.222354 0.030839 -0.000058  
6 -0.680708 1.307776 0.000030  
6 0.680708 1.307776 0.000078  
7 1.222354 0.030839 -0.000051

|   |           |           |           |
|---|-----------|-----------|-----------|
| 6 | -2.671090 | -0.136512 | 0.000032  |
| 1 | -1.318797 | 2.184770  | -0.000214 |
| 1 | 1.318797  | 2.184770  | -0.000134 |
| 6 | 2.671090  | -0.136512 | 0.000019  |
| 1 | 3.122713  | 0.318716  | -0.891076 |
| 1 | -2.914618 | -1.203117 | -0.000397 |
| 1 | 3.122643  | 0.317920  | 0.891576  |
| 1 | -3.122634 | 0.317941  | 0.891583  |
| 1 | -3.122722 | 0.318695  | -0.891069 |
| 1 | 2.914618  | -1.203117 | -0.000437 |

35. **4** (R = Ph), T. E. = -939.53203

|    |           |           |           |
|----|-----------|-----------|-----------|
| 14 | -0.000157 | -0.970366 | -0.430865 |
| 7  | -1.229053 | 0.175880  | 0.205877  |
| 6  | -0.677940 | 1.314332  | 0.792440  |
| 6  | 0.678091  | 1.314347  | 0.792175  |
| 7  | 1.229015  | 0.175780  | 0.205476  |
| 1  | -1.313009 | 2.066264  | 1.243805  |
| 1  | 1.313338  | 2.066355  | 1.243289  |
| 6  | -2.638021 | 0.044827  | 0.057989  |
| 6  | -3.253594 | -1.195970 | 0.284112  |
| 6  | -4.632103 | -1.339423 | 0.115760  |
| 6  | -5.418337 | -0.246511 | -0.259213 |
| 6  | -4.809015 | 0.992803  | -0.476109 |
| 6  | -3.428671 | 1.139141  | -0.328348 |
| 1  | -2.650984 | -2.039181 | 0.609707  |
| 1  | -5.093036 | -2.307429 | 0.295159  |

1 -6.492466 -0.358431 -0.379402  
1 -5.407181 1.849662 -0.776335  
1 -2.957381 2.095883 -0.534879  
6 2.638054 0.044772 0.057831  
6 3.428627 1.139051 -0.328563  
6 4.808970 0.992828 -0.476156  
6 5.418378 -0.246437 -0.259014  
6 4.632236 -1.339380 0.115928  
6 3.253660 -1.196049 0.284011  
1 2.957220 2.095787 -0.535128  
1 5.407041 1.849565 -0.776482  
1 6.492562 -0.358274 -0.378898  
1 5.093242 -2.307351 0.295252  
1 2.651102 -2.039345 0.609505

36. 4 (R = <sup>t</sup>Bu), T. E. = -791.86384

14 0.000000 1.181696 -0.000275  
7 1.238715 -0.112238 -0.000209  
6 0.679152 -1.384378 -0.000100  
6 -0.679152 -1.384378 -0.000101  
7 -1.238715 -0.112239 -0.000209  
1 1.292508 -2.276786 -0.000110  
1 -1.292508 -2.276786 -0.000111  
6 2.719299 0.039693 0.000046  
6 -2.719299 0.039693 0.000046  
6 3.310085 -0.616453 1.266140  
1 4.398888 -0.487974 1.287910

|     |                                       |           |           |
|-----|---------------------------------------|-----------|-----------|
| 1   | 2.889529                              | -0.156877 | 2.167530  |
| 1   | 3.100683                              | -1.690839 | 1.304150  |
| 6   | 3.087420                              | 1.532839  | 0.000258  |
| 1   | 2.698163                              | 2.044948  | 0.887325  |
| 1   | 4.178213                              | 1.638754  | 0.000504  |
| 1   | 2.698536                              | 2.045163  | -0.886857 |
| 6   | 3.310445                              | -0.616279 | -1.265991 |
| 1   | 4.399284                              | -0.488018 | -1.287515 |
| 1   | 3.100844                              | -1.690629 | -1.304259 |
| 1   | 2.890191                              | -0.156485 | -2.167412 |
| 6   | -3.087419                             | 1.532839  | 0.000259  |
| 1   | -4.178213                             | 1.638754  | 0.000505  |
| 1   | -2.698163                             | 2.044948  | 0.887325  |
| 1   | -2.698536                             | 2.045164  | -0.886857 |
| 6   | -3.310085                             | -0.616453 | 1.266140  |
| 1   | -3.100683                             | -1.690840 | 1.304149  |
| 1   | -2.889529                             | -0.156877 | 2.167530  |
| 1   | -4.398888                             | -0.487974 | 1.287910  |
| 6   | -3.310445                             | -0.616279 | -1.265992 |
| 1   | -2.890191                             | -0.156485 | -2.167412 |
| 1   | -3.100844                             | -1.690629 | -1.304259 |
| 1   | -4.399284                             | -0.488018 | -1.287515 |
| 37. | <b>5</b> (R = H), T. E. = -2263.10861 |           |           |
| 32  | 0.990593                              | 0.000000  | -0.000003 |
| 7   | -0.409850                             | -1.230642 | 0.000027  |
| 6   | -1.679846                             | -0.681068 | -0.000037 |



6 -1.679846 0.681068 -0.000037  
7 -0.409850 1.230642 0.000027  
1 -0.337313 -2.240606 -0.000028  
1 -2.564146 -1.307563 0.000101  
1 -2.564146 1.307563 0.000101  
1 -0.337313 2.240606 -0.000028

38. 5 (R = F), T. E. = -2461.45987

32 0.000000 -1.101336 0.000255  
7 1.180185 0.368201 -0.000455  
6 0.683538 1.645733 0.000446  
6 -0.683538 1.645733 0.000445  
7 -1.180185 0.368201 -0.000455  
9 2.574981 0.296465 -0.000515  
1 1.344202 2.501386 0.001059  
1 -1.344202 2.501387 0.001058  
9 -2.574981 0.296464 -0.000515

39. 5 (R = Cl), T. E. = -3182.23625

32 -0.001697 -1.106688 0.000000  
7 0.000387 0.329115 1.217637  
6 0.002392 1.605093 0.680724  
6 0.002392 1.605093 -0.680724  
7 0.000387 0.329115 -1.217637  
17 0.000387 0.193673 2.943144  
1 0.003517 2.480211 1.316886  
1 0.003517 2.480211 -1.316886

17 0.000387 0.193673 -2.943144

40. **5** (R = OH), T. E. = -2413.42711

32 -0.000504 -1.070245 0.000002

7 -1.211884 0.357042 -0.015494

6 -0.681525 1.629129 -0.012728

6 0.682594 1.628554 0.012451

7 1.212385 0.356227 0.015211

8 -2.614541 0.273485 -0.102674

1 -1.334603 2.491781 -0.038665

1 1.336272 2.490761 0.038418

8 2.615035 0.272989 0.103047

1 2.925897 0.174995 -0.814771

1 -2.925309 0.179540 0.815608

41. **5** (R = NH<sub>2</sub>), T. E. = -2373.71086

32 0.000195 -1.057751 -0.000047

7 -1.231841 0.342637 -0.000065

6 -0.681304 1.614365 -0.000070

6 0.680803 1.614634 -0.000046

7 1.231646 0.343071 -0.000090

7 -2.636259 0.161691 0.000155

1 -1.320230 2.491736 -0.000150

1 1.319340 2.492286 -0.000259

7 2.636158 0.162007 0.000209

1 3.036186 0.606182 -0.826523

1 -3.036013 0.605586 0.827132

1 3.035867 0.606414 0.826971

1 -3.036321 0.606007 -0.826447

42. **5** (R = PH<sub>2</sub>), T. E. = -2946.98793

32 -0.000018 -1.047431 -0.000014

7 -1.266253 0.330391 -0.009715

6 -0.678099 1.596273 -0.008221

6 0.678098 1.596266 0.008104

7 1.266260 0.330383 0.009653

15 -3.019972 0.247404 -0.037975

1 -1.294990 2.488547 -0.022245

1 1.295020 2.488517 0.021993

15 3.019991 0.247523 0.037749

1 3.258752 -0.328583 -1.247426

1 -3.259087 -0.324718 1.248951

1 3.141138 -1.004154 0.703857

1 -3.140591 -1.006389 -0.700167

43. **5** (R = CH<sub>3</sub>), T. E. = -2341.67582

32 0.000000 -1.029803 -0.000031

7 -1.250337 0.349270 -0.000041

6 -0.682085 1.606619 0.000006

6 0.682085 1.606619 -0.000001

7 1.250337 0.349270 -0.000042

6 -2.700610 0.224052 0.000116

1 -1.305984 2.494990 -0.000306

1 1.305984 2.494990 -0.000317

|   |           |           |           |
|---|-----------|-----------|-----------|
| 6 | 2.700610  | 0.224052  | 0.000118  |
| 1 | 3.140546  | 0.693325  | -0.890198 |
| 1 | -3.140545 | 0.693328  | -0.890199 |
| 1 | 3.140333  | 0.693597  | 0.890368  |
| 1 | -2.979130 | -0.833970 | 0.000213  |
| 1 | 2.979130  | -0.833970 | 0.000219  |
| 1 | -3.140334 | 0.693594  | 0.890367  |

44. **5** (R = Ph), T. E. = -2725.07690

|    |           |           |           |
|----|-----------|-----------|-----------|
| 32 | 0.002060  | -0.983973 | 0.000000  |
| 7  | -0.000429 | 0.421140  | 1.247171  |
| 6  | -0.002687 | 1.684415  | 0.681581  |
| 6  | -0.002687 | 1.684415  | -0.681581 |
| 7  | -0.000429 | 0.421140  | -1.247171 |
| 1  | -0.004264 | 2.566748  | 1.311496  |
| 1  | -0.004264 | 2.566748  | -1.311496 |
| 6  | -0.000368 | 0.237588  | 2.659647  |
| 6  | 1.209975  | 0.120765  | 3.355317  |
| 6  | 1.208467  | -0.092952 | 4.735793  |
| 6  | -0.000118 | -0.207390 | 5.428730  |
| 6  | -1.208829 | -0.096227 | 4.735488  |
| 6  | -1.210565 | 0.117498  | 3.355010  |
| 1  | 2.143620  | 0.202081  | 2.805343  |
| 1  | 2.152630  | -0.182220 | 5.267225  |
| 1  | -0.000018 | -0.381423 | 6.501547  |
| 1  | -2.152884 | -0.188049 | 5.266677  |
| 1  | -2.144291 | 0.196275  | 2.804805  |

|   |           |           |           |
|---|-----------|-----------|-----------|
| 6 | -0.000368 | 0.237588  | -2.659647 |
| 6 | -1.210565 | 0.117498  | -3.355010 |
| 6 | -1.208829 | -0.096227 | -4.735488 |
| 6 | -0.000118 | -0.207390 | -5.428730 |
| 6 | 1.208467  | -0.092952 | -4.735793 |
| 6 | 1.209975  | 0.120765  | -3.355317 |
| 1 | -2.144291 | 0.196275  | -2.804805 |
| 1 | -2.152884 | -0.188049 | -5.266677 |
| 1 | -0.000018 | -0.381423 | -6.501547 |
| 1 | 2.152630  | -0.182220 | -5.267225 |
| 1 | 2.143620  | 0.202081  | -2.805343 |

45. **5** (R = <sup>t</sup>Bu), T. E. = -2577.40846

|    |           |           |           |
|----|-----------|-----------|-----------|
| 32 | 1.088339  | -0.000187 | 0.000000  |
| 7  | -0.285097 | -0.000082 | 1.267553  |
| 6  | -1.536502 | -0.000253 | 0.680777  |
| 6  | -1.536502 | -0.000253 | -0.680777 |
| 7  | -0.285097 | -0.000082 | -1.267553 |
| 1  | -2.441529 | -0.000331 | 1.277041  |
| 1  | -2.441529 | -0.000331 | -1.277041 |
| 6  | -0.161589 | 0.000082  | 2.744305  |
| 6  | -0.161589 | 0.000082  | -2.744305 |
| 6  | -0.825931 | -1.268346 | 3.318820  |
| 1  | -0.726060 | -1.291928 | 4.410682  |
| 1  | -1.893618 | -1.312362 | 3.079358  |
| 1  | -0.349199 | -2.165035 | 2.907281  |
| 6  | -0.825720 | 1.268819  | 3.318386  |

|   |           |           |           |
|---|-----------|-----------|-----------|
| 1 | -0.725897 | 1.292606  | 4.410236  |
| 1 | -0.348770 | 2.165275  | 2.906607  |
| 1 | -1.893370 | 1.312902  | 3.078793  |
| 6 | 1.325921  | 0.000070  | 3.130553  |
| 1 | 1.839914  | 0.887847  | 2.744811  |
| 1 | 1.423943  | 0.000347  | 4.221954  |
| 1 | 1.839763  | -0.887994 | 2.745248  |
| 6 | -0.825931 | -1.268346 | -3.318820 |
| 1 | -0.349199 | -2.165035 | -2.907281 |
| 1 | -1.893618 | -1.312362 | -3.079358 |
| 1 | -0.726060 | -1.291928 | -4.410682 |
| 6 | -0.825720 | 1.268819  | -3.318386 |
| 1 | -1.893370 | 1.312902  | -3.078793 |
| 1 | -0.348770 | 2.165275  | -2.906607 |
| 1 | -0.725897 | 1.292606  | -4.410236 |
| 6 | 1.325921  | 0.000070  | -3.130553 |
| 1 | 1.423943  | 0.000347  | -4.221954 |
| 1 | 1.839914  | 0.887847  | -2.744811 |
| 1 | 1.839763  | -0.887994 | -2.745248 |

46. **6** (R = H), T. E. = -226.08239

|   |           |           |           |
|---|-----------|-----------|-----------|
| 6 | -0.647616 | 0.907017  | -0.000113 |
| 7 | -1.061806 | -0.373332 | 0.000017  |
| 6 | -0.023675 | -1.329078 | -0.000432 |
| 6 | 1.082523  | -0.490605 | 0.000287  |
| 7 | 0.689624  | 0.853917  | -0.000085 |
| 1 | 2.135673  | -0.732548 | 0.000737  |

1 1.288806 1.670514 -0.000292

1 -2.039551 -0.631661 0.001338

1 -1.247042 1.805600 0.000240

47. **6** (R = F), T. E. = -424.42664

6 -0.041200 -0.892692 0.000331

7 -1.042295 -0.002740 0.000023

6 -0.740025 1.302848 0.000088

6 0.652286 1.257713 0.000031

7 1.021554 -0.071383 -0.000012

1 1.395182 2.040223 0.000004

1 -0.044448 -1.970124 0.000432

9 -2.360755 -0.482736 -0.000191

9 2.312765 -0.579314 -0.000165

48. **6** (R = Cl), T. E. = -1145.20268

6 -0.024820 -0.680643 0.000061

7 -1.067939 0.163734 0.000023

6 -0.746562 1.498505 -0.000007

6 0.635023 1.462380 0.000001

7 1.048017 0.130282 0.000011

1 1.366621 2.255949 0.000029

1 -0.013988 -1.758888 0.000069

17 2.681849 -0.499266 -0.000019

17 -2.705086 -0.455830 -0.000020

49. **6** (R = OH), T. E. = -376.40586

6 -0.015218 -0.899244 -0.005819  
7 -1.059839 -0.065866 0.003673  
6 -0.774553 1.279152 0.006898  
6 0.614678 1.250983 -0.009372  
7 1.046162 -0.068301 -0.002080  
1 1.338461 2.052300 -0.030865  
1 0.007527 -1.976379 -0.025696  
8 -2.358310 -0.560633 0.008998  
8 2.352942 -0.530154 -0.098432  
1 -2.872977 0.275110 0.005222  
1 2.716235 -0.470923 0.805410

50. **6** (R = NH<sub>2</sub>), T. E. = -336.69541

6 0.029956 -0.875806 -0.000037  
7 1.081092 -0.042775 0.000019  
6 0.749529 1.321074 0.000056  
6 -0.632818 1.245907 -0.000010  
7 -1.055246 -0.092912 -0.000072  
1 -1.377362 2.031060 0.000061  
1 0.033286 -1.954025 -0.000318  
7 2.396064 -0.571477 0.000031  
1 2.858336 -0.161311 -0.812725  
1 2.858396 -0.161004 0.812595  
7 -2.359536 -0.627953 -0.000085  
1 -2.844274 -0.278927 0.825878  
1 -2.845007 -0.277026 -0.824800

51. **6** (R = PH<sub>2</sub>), T. E. = -909.95635



6 0.011831 -0.693259 -0.004050  
7 1.092086 0.105868 -0.021299  
6 0.757751 1.490983 -0.018513  
6 -0.619941 1.431940 0.005673  
7 -1.078157 0.096175 0.007514  
1 -1.348935 2.230375 0.015601  
1 -0.012011 -1.773726 0.004308  
15 2.805305 -0.347466 -0.078843  
1 3.037300 -0.286515 1.326252  
1 2.568121 -1.757988 -0.050517  
15 -2.724311 -0.568223 0.005618  
1 -3.228927 0.271044 1.036694  
1 -3.225796 0.259859 -1.036133

52. **6** (R = CH<sub>3</sub>), T. E. = -304.65316

6 -0.030109 -0.843115 -0.000106  
7 -1.095592 -0.021456 -0.000467  
6 -0.746162 1.345691 -0.000115  
6 0.636585 1.258323 0.000043  
7 1.066501 -0.074254 0.000240  
1 1.378564 2.045825 0.000508  
1 -0.032545 -1.923923 -0.000017  
6 -2.477823 -0.485175 0.000208  
1 -2.507954 -1.579317 -0.001532  
1 -2.986637 -0.104718 0.889472  
1 -2.988477 -0.101736 -0.886674  
6 2.443348 -0.550335 -0.000026

1 2.963778 -0.189559 -0.892585

1 2.965108 -0.186240 0.890389

1 2.456769 -1.642688 0.001998

53. **6** (R = Ph), T. E. = -688.03888

6 0.014080 -0.237287 0.013323

7 1.093172 0.572245 -0.010128

6 0.751445 1.951077 -0.081193

6 -0.626265 1.879492 -0.075662

7 -1.074541 0.544081 -0.022702

1 -1.360658 2.669750 -0.136760

1 -0.002904 -1.315204 0.052649

6 2.439675 0.091413 0.034419

6 2.754764 -1.107609 0.683936

6 4.075633 -1.562830 0.696542

6 5.083429 -0.819569 0.077552

6 4.761830 0.387524 -0.552066

6 3.445048 0.847401 -0.576869

1 1.985943 -1.671559 1.204628

1 4.315365 -2.492013 1.206996

1 6.111203 -1.172364 0.094157

1 5.540492 0.976955 -1.029252

1 3.173424 1.786190 -1.046418

6 -2.424686 0.082041 -0.027859

6 -3.363420 0.704100 0.802565

6 -4.689484 0.267781 0.790034

6 -5.078380 -0.790138 -0.036941

6 -4.134742 -1.406816 -0.863475  
6 -2.809399 -0.967617 -0.870185  
1 -3.049446 1.509430 1.459642  
1 -5.416796 0.750706 1.436990  
1 -6.110674 -1.128986 -0.040410  
1 -4.431283 -2.222032 -1.517959  
1 -2.082239 -1.418923 -1.539190

54. **6** (R = <sup>t</sup>Bu), T. E. = -540.38017

6 -0.016090 0.521601 -0.000012  
7 -1.096336 -0.282418 -0.000009  
6 -0.753694 -1.653852 -0.000008  
6 0.625814 -1.582689 0.000021  
7 1.079066 -0.253596 0.000049  
1 1.344350 -2.389647 0.000019  
1 -0.009298 1.597242 -0.000096  
6 -2.516512 0.183138 0.000009  
6 2.500406 0.194939 -0.000001  
6 -3.194682 -0.375450 -1.263072  
1 -4.257127 -0.104414 -1.270095  
1 -2.727095 0.030603 -2.168298  
1 -3.098950 -1.464094 -1.285254  
6 -2.589531 1.717150 -0.000115  
1 -2.122639 2.151154 0.892504  
1 -2.122324 2.151003 -0.892641  
1 -3.641127 2.022172 -0.000313  
6 -3.194627 -0.375261 1.263194

|   |           |           |           |
|---|-----------|-----------|-----------|
| 1 | -4.257050 | -0.104127 | 1.270287  |
| 1 | -3.098994 | -1.463909 | 1.285534  |
| 1 | -2.726919 | 0.030853  | 2.168328  |
| 6 | 2.580720  | 1.728901  | 0.000082  |
| 1 | 2.113612  | 2.161448  | 0.891979  |
| 1 | 3.633896  | 2.029122  | -0.000178 |
| 1 | 2.113171  | 2.161578  | -0.891521 |
| 6 | 3.182035  | -0.355442 | -1.267400 |
| 1 | 3.153286  | -1.448789 | -1.294711 |
| 1 | 2.685351  | 0.019843  | -2.168857 |
| 1 | 4.231830  | -0.041821 | -1.293126 |
| 6 | 3.182151  | -0.355537 | 1.267281  |
| 1 | 3.153522  | -1.448888 | 1.294530  |
| 1 | 4.231928  | -0.041843 | 1.292939  |
| 1 | 2.685519  | 0.019621  | 2.168818  |

Cartesian coordinates of the IrCl(CO)<sub>2</sub> complexes of **1** and **6** along with the total energies including zero point vibrational energies (in a. u) of the respective molecules.

1. IrCl(CO)<sub>2</sub>-**1** (R = H), T. E. = -1017.81613

|   |           |           |           |
|---|-----------|-----------|-----------|
| 6 | -1.535954 | 0.000031  | -0.050904 |
| 7 | -2.399126 | 1.060894  | -0.012584 |
| 6 | -3.72924  | 0.673352  | -0.109604 |
| 6 | -3.722433 | -0.680198 | -0.207643 |
| 7 | -2.388578 | -1.064455 | -0.165045 |
| 1 | -2.085783 | 2.016620  | 0.079559  |
| 1 | -4.543555 | 1.380908  | -0.097066 |
| 1 | -4.529609 | -1.390150 | -0.298924 |

|    |           |           |           |
|----|-----------|-----------|-----------|
| 1  | -2.064094 | -2.018909 | -0.226807 |
| 77 | 0.454292  | -0.000331 | -0.055974 |
| 6  | 0.568185  | 1.870148  | 0.311685  |
| 8  | 0.656312  | 2.962955  | 0.671126  |
| 6  | 0.564516  | -1.861078 | 0.366025  |
| 8  | 0.653428  | -2.942654 | 0.75649   |
| 17 | 2.847534  | -0.006708 | -0.422447 |

2. IrCl(CO)<sub>2</sub>-1 (R = F), T. E. = -1216.13667

|    |           |           |           |
|----|-----------|-----------|-----------|
| 6  | -1.337236 | 0.000188  | -0.000976 |
| 7  | -2.246482 | 0.995707  | 0.251415  |
| 6  | -3.581527 | 0.657939  | 0.171029  |
| 6  | -3.580943 | -0.658751 | -0.176237 |
| 7  | -2.245618 | -0.995720 | -0.255034 |
| 1  | -4.375131 | 1.362005  | 0.362308  |
| 1  | -4.373905 | -1.363113 | -0.369083 |
| 77 | 0.630505  | -0.000065 | -0.001059 |
| 6  | 0.778984  | 1.903141  | -0.307524 |
| 8  | 0.947452  | 3.020655  | -0.497135 |
| 6  | 0.777307  | -1.900986 | 0.320845  |
| 8  | 0.944199  | -3.016182 | 0.524898  |
| 17 | 3.044668  | -0.002127 | -0.008119 |
| 9  | -1.867049 | 2.242410  | 0.642166  |
| 9  | -1.864861 | -2.242698 | -0.643642 |

3. IrCl(CO)<sub>2</sub>-1 (R = Cl), T. E. = -1936.91107

|   |           |           |           |
|---|-----------|-----------|-----------|
| 6 | -1.205730 | -0.038922 | -0.041845 |
|---|-----------|-----------|-----------|

|    |           |           |           |
|----|-----------|-----------|-----------|
| 7  | -2.141114 | 0.913611  | 0.290996  |
| 6  | -3.457467 | 0.491088  | 0.128197  |
| 6  | -3.385259 | -0.783048 | -0.327374 |
| 7  | -2.028622 | -1.075676 | -0.419636 |
| 1  | -4.299446 | 1.127300  | 0.349289  |
| 1  | -4.149968 | -1.494882 | -0.594200 |
| 77 | 0.778418  | -0.001428 | -0.024650 |
| 6  | 0.887224  | 1.623136  | -1.044394 |
| 8  | 0.998639  | 2.638113  | -1.573010 |
| 6  | 0.872698  | -1.252054 | 1.439749  |
| 8  | 0.961506  | -1.909667 | 2.378096  |
| 17 | 3.184595  | -0.139088 | -0.184224 |
| 17 | -1.753606 | 2.449147  | 0.922937  |
| 17 | -1.445729 | -2.572222 | -0.993021 |

4. IrCl(CO)<sub>2</sub>-1 (R = OH), T. E. = -1168.13003

|    |           |           |           |
|----|-----------|-----------|-----------|
| 6  | -1.369543 | -0.000053 | 0.000059  |
| 7  | -2.223905 | -0.000284 | -1.051443 |
| 6  | -3.547672 | -0.000143 | -0.685870 |
| 6  | -3.547601 | -0.000137 | 0.686208  |
| 7  | -2.223791 | 0.000028  | 1.051645  |
| 1  | -4.348987 | -0.000214 | -1.406910 |
| 1  | -4.348832 | -0.000186 | 1.407339  |
| 77 | 0.636919  | 0.000041  | -0.000032 |
| 6  | 0.697664  | 1.932281  | -0.000422 |
| 8  | 0.750873  | 3.077190  | -0.000674 |
| 6  | 0.698039  | -1.932196 | -0.000093 |

8 0.751770 -3.077079 -0.000055  
17 3.044669 0.000133 0.000334  
8 -1.808324 -0.000559 -2.364275  
8 -1.808099 0.000267 2.364446  
1 -0.822865 -0.000369 -2.279475  
1 -0.822650 0.000106 2.279603

5. IrCl(CO)<sub>2</sub>-1 (R = NH<sub>2</sub>), T. E. = -1128.41647

6 1.360643 -0.018803 -0.044441  
7 2.166762 -0.992750 -0.579239  
6 3.514835 -0.695677 -0.453721  
6 3.585534 0.491829 0.196424  
7 2.268903 0.893948 0.426104  
1 4.272190 -1.353690 -0.849439  
1 4.429165 1.088601 0.507449  
77 -0.633743 -0.007593 -0.032493  
6 -0.726661 -1.680784 0.887882  
8 -0.803728 -2.623057 1.548902  
6 -0.733302 1.888846 -0.362769  
8 -0.863769 3.024959 -0.475018  
17 -3.042132 -0.079480 -0.284455  
7 1.738022 -2.135516 -1.274185  
1 1.372604 -2.809445 -0.601536  
1 0.963392 -1.854085 -1.875860  
7 1.877370 2.074868 1.066360  
1 2.047703 1.996742 2.067643  
1 2.405705 2.856176 0.684805

6. IrCl(CO)<sub>2</sub>-1 (R = PH<sub>2</sub>), T. E. = -1701.68111

6 -1.243849 0.112574 -0.006516  
7 -2.225492 -0.824949 0.197483  
6 -3.488250 -0.238055 0.053327  
6 -3.294534 1.067165 -0.250798  
7 -1.913948 1.273290 -0.278458  
1 -4.397614 -0.804106 0.188096  
1 -4.000951 1.860031 -0.441857  
77 0.757609 -0.026730 -0.001780  
6 0.868334 0.412797 1.869424  
8 0.946807 0.558027 3.007989  
6 0.778430 -1.053057 -1.619631  
8 0.812318 -1.763150 -2.526146  
17 3.177804 0.079781 -0.116519  
15 -2.039595 -2.545805 0.625588  
1 -1.339594 -2.949064 -0.542507  
1 -0.852828 -2.375404 1.380719  
15 -0.989307 2.772228 -0.588951  
1 -0.991035 2.679733 -2.010203

7. IrCl(CO)<sub>2</sub>-1 (R = CH<sub>3</sub>), T. E. = -1096.38473

6 -1.377098 -0.001578 0.070805  
7 -2.168094 -0.041769 1.184207  
6 -3.512265 -0.029912 0.840999  
6 -3.569586 0.018149 -0.514399  
7 -2.259030 0.035137 -0.971429  
1 -4.296102 -0.057174 1.582735



1 -4.413821 0.041320 -1.186710  
77 0.643547 -0.000604 0.040747  
6 0.705211 -1.867977 -0.382094  
8 0.754841 -2.952633 -0.769400  
6 0.705529 1.888833 -0.270613  
8 0.754596 2.994483 -0.593232  
17 3.046469 -0.012218 0.345521  
6 -1.675320 -0.090706 2.558627  
1 -2.042144 -0.993730 3.056083  
1 -0.584071 -0.109443 2.528270  
1 -2.009561 0.793701 3.109809  
6 -1.892611 0.083856 -2.385084  
1 -0.804154 0.082644 -2.450746  
1 -2.293800 -0.791289 -2.905650  
1 -2.288251 0.995799 -2.842996

8. IrCl(CO)<sub>2</sub>-1 (R = Ph), T. E. = -1479.75694

6 -0.069299 0.998262 -0.057560  
7 0.973002 1.890292 -0.160404  
6 0.512089 3.204663 -0.187381  
6 -0.837132 3.148292 -0.104857  
7 -1.184299 1.799898 -0.021040  
1 1.185043 4.041901 -0.284951  
1 -1.581497 3.928269 -0.077682  
77 0.114308 -0.999657 -0.015596  
6 1.006602 -0.959572 1.684966  
8 1.409562 -0.978186 2.764463

6 -1.321780 -1.302722 -1.240724  
8 -2.244982 -1.551451 -1.884341  
17 0.622262 -3.370172 -0.168545  
6 2.364119 1.545364 -0.240353  
6 2.814585 0.653596 -1.218721  
6 4.173804 0.338733 -1.282132  
6 5.077273 0.921997 -0.388801  
6 4.618974 1.820551 0.579074  
6 3.259376 2.131382 0.660045  
1 2.109733 0.211270 -1.914742  
1 4.523082 -0.364046 -2.033031  
1 6.133513 0.673480 -0.443664  
1 5.314372 2.269151 1.283034  
1 2.891572 2.804316 1.429802  
6 -2.547816 1.369360 0.122837  
6 -2.928934 0.582374 1.213224  
6 -4.266069 0.203494 1.346692  
6 -5.216170 0.617481 0.407759  
6 -4.826789 1.411622 -0.674190  
6 -3.489407 1.787520 -0.822102  
1 -2.184562 0.262324 1.933340  
1 -4.563360 -0.416458 2.187743  
1 -6.254809 0.317739 0.516575  
1 -5.557964 1.728027 -1.412812  
1 -3.173444 2.381959 -1.674996

9. IrCl(CO)<sub>2</sub>-1 (R = <sup>t</sup>Bu), T. E. = -1332.08792

|    |           |           |           |
|----|-----------|-----------|-----------|
| 6  | 0.950407  | 0.384297  | -0.019515 |
| 7  | 1.262766  | 1.728553  | -0.003837 |
| 6  | 2.639412  | 1.896537  | -0.036725 |
| 6  | 3.196783  | 0.667014  | -0.073655 |
| 7  | 2.165610  | -0.264908 | -0.070178 |
| 1  | 3.121203  | 2.857490  | -0.037782 |
| 1  | 4.237107  | 0.400180  | -0.109375 |
| 77 | -0.960047 | -0.339498 | -0.004975 |
| 6  | -0.962438 | -0.646879 | -1.896534 |
| 8  | -0.961575 | -0.963384 | -3.005472 |
| 6  | -0.947538 | -0.788277 | 1.853219  |
| 8  | -0.958215 | -1.183020 | 2.937711  |
| 17 | -3.345490 | -0.838272 | -0.005687 |
| 6  | 0.299966  | 2.897605  | 0.047297  |
| 6  | 2.456562  | -1.754427 | -0.002376 |
| 6  | 2.255580  | -2.232651 | 1.446105  |
| 1  | 1.213150  | -2.151640 | 1.754500  |
| 1  | 2.549135  | -3.285428 | 1.528449  |
| 1  | 2.873244  | -1.651268 | 2.140493  |
| 6  | 1.569619  | -2.547407 | -0.973707 |
| 1  | 0.517068  | -2.502419 | -0.690307 |
| 1  | 1.676675  | -2.177272 | -1.999378 |
| 1  | 1.885360  | -3.596431 | -0.956727 |
| 6  | 3.925337  | -1.999672 | -0.406261 |
| 1  | 4.640064  | -1.598813 | 0.320242  |
| 1  | 4.087692  | -3.080561 | -0.447421 |
| 1  | 4.151974  | -1.592438 | -1.397886 |

|   |           |          |           |
|---|-----------|----------|-----------|
| 6 | -0.525372 | 2.830972 | 1.343776  |
| 1 | -1.157006 | 3.723043 | 1.419074  |
| 1 | -1.181127 | 1.956425 | 1.356841  |
| 1 | 0.128644  | 2.796665 | 2.222660  |
| 6 | 1.096322  | 4.216326 | 0.049110  |
| 1 | 0.379141  | 5.041377 | 0.089209  |
| 1 | 1.749219  | 4.309863 | 0.923927  |
| 1 | 1.691462  | 4.346523 | -0.861512 |
| 6 | -0.604536 | 2.884162 | -1.196992 |
| 1 | -1.232150 | 3.782229 | -1.199266 |
| 1 | -0.006791 | 2.879387 | -2.115700 |
| 1 | -1.268068 | 2.015206 | -1.202555 |

10.  $\text{IrCl}(\text{CO})_2 - \mathbf{6}$  (R = H), T. E. = -1017.79336

|    |           |           |           |
|----|-----------|-----------|-----------|
| 6  | 3.687187  | -0.685898 | -0.187611 |
| 7  | 2.393715  | -1.031034 | -0.104619 |
| 6  | 1.531972  | 0.083951  | -0.055659 |
| 6  | 2.426940  | 1.146489  | -0.106151 |
| 7  | 3.719105  | 0.649449  | -0.190442 |
| 1  | 2.244655  | 2.208815  | -0.086929 |
| 1  | 4.564858  | 1.202258  | -0.242995 |
| 1  | 2.068624  | -1.989320 | -0.082881 |
| 1  | 4.536378  | -1.348868 | -0.240986 |
| 77 | -0.474319 | 0.000709  | -0.060535 |
| 17 | -2.861743 | -0.050153 | -0.499838 |
| 6  | -0.522720 | -1.839539 | 0.396664  |
| 8  | -0.556853 | -2.911200 | 0.835493  |

6 -0.609856 1.851452 0.390354

8 -0.707300 2.918384 0.821014

11. IrCl(CO)<sub>2</sub> – 6 (R = F), T. E. = -1216.11251

6 -3.373741 0.807653 -0.275494

7 -2.046488 1.036760 -0.325299

6 -1.215763 -0.033729 -0.014819

6 -2.173182 -1.030193 0.248086

7 -3.413520 -0.477156 0.079783

1 -2.052049 -2.054058 0.561751

1 -4.190132 1.475249 -0.492928

77 0.781599 -0.074927 -0.029938

17 3.175967 -0.124837 -0.344113

6 0.978378 1.745127 0.555840

8 1.149978 2.779172 1.030072

6 0.804455 -1.985288 0.054911

8 0.842645 -3.123130 0.234518

9 -1.606135 2.284540 -0.648190

9 -4.591000 -1.141939 0.234528

12. IrCl(CO)<sub>2</sub> – 6 (R = Cl), T. E. = -1936.89132

6 -3.027459 0.849776 -0.426056

7 -1.695834 1.032217 -0.528848

6 -0.938450 -0.036204 -0.000665

6 -1.932031 -0.900095 0.441515

7 -3.170788 -0.339943 0.169938

1 -1.848937 -1.849367 0.945129

1 -3.811041 1.508343 -0.762464  
77 1.064709 -0.160148 0.035844  
17 3.469111 -0.155716 -0.207263  
6 1.206099 1.268086 1.307206  
8 1.300445 2.023382 2.172622  
6 1.015464 -1.970763 -0.578051  
8 0.988678 -3.099430 -0.812268  
17 -1.039407 2.450139 -1.233400  
17 -4.695055 -1.049123 0.512613

13.  $\text{IrCl}(\text{CO})_2 - 6$  (R = OH), T. E. = -1168.10923

6 3.283769 -0.004661 0.891163  
7 1.959853 -0.008261 1.052518  
6 1.241146 -0.008938 -0.143390  
6 2.242916 -0.014440 -1.099893  
7 3.459658 0.007138 -0.443715  
1 2.190648 -0.038283 -2.176657  
1 4.050177 -0.018058 1.648202  
77 -0.786624 -0.000095 -0.104086  
17 -3.206110 0.020960 -0.058894  
6 -0.812414 1.926708 -0.107532  
8 -0.825324 3.074905 -0.121141  
6 -0.841682 -1.928785 -0.112788  
8 -0.878343 -3.076018 -0.130128  
8 1.361066 -0.005847 2.283334  
8 4.703126 -0.104659 -1.028802  
1 0.388807 -0.006488 2.016712

1 4.941136 0.795351 -1.325526

14.  $\text{IrCl}(\text{CO})_2 - \mathbf{6}$  (R = NH<sub>2</sub>), T. E. = -1128.39898

6 3.303760 -0.684192 -0.610428

7 1.984108 -0.885724 -0.739387

6 1.224082 0.039202 0.008566

6 2.200123 0.813735 0.609542

7 3.451383 0.356514 0.221986

1 2.121165 1.646940 1.289127

1 4.083209 -1.247290 -1.098950

77 -0.798503 0.059767 0.005643

17 -3.193987 -0.000974 -0.353386

6 -0.877096 -1.595723 0.944067

8 -0.925368 -2.513796 1.645380

6 -0.809799 1.967299 -0.137504

8 -0.820358 3.118783 -0.069053

7 1.500172 -1.904622 -1.582368

7 4.651254 0.935412 0.666460

1 1.070268 -2.615742 -0.989253

1 5.200766 0.240020 1.166663

1 0.741239 -1.489205 -2.126376

1 5.176812 1.286920 -0.131104

15.  $\text{IrCl}(\text{CO})_2 - \mathbf{6}$  (R = PH<sub>2</sub>), T. E. = -1701.66171

6 -2.983981 0.861806 -0.486957

7 -1.656551 1.054601 -0.584938

6 -0.949675 -0.024398 0.019841

|    |           |           |           |
|----|-----------|-----------|-----------|
| 6  | -1.958547 | -0.842430 | 0.477704  |
| 7  | -3.206404 | -0.290243 | 0.160903  |
| 1  | -1.893462 | -1.779571 | 1.008914  |
| 1  | -3.746782 | 1.521993  | -0.872541 |
| 77 | 1.070079  | -0.155412 | 0.058799  |
| 17 | 3.483010  | -0.060459 | -0.176844 |
| 6  | 1.151282  | 0.899302  | 1.648574  |
| 8  | 1.189275  | 1.394053  | 2.691989  |
| 6  | 1.012552  | -1.810220 | -0.888142 |
| 8  | 0.967874  | -2.881991 | -1.316330 |
| 15 | -0.971528 | 2.487829  | -1.416122 |
| 1  | -0.268947 | 2.994026  | -0.291696 |
| 1  | 0.156804  | 1.788107  | -1.917558 |
| 15 | -4.759615 | -1.065486 | 0.581675  |
| 1  | -5.377549 | 0.102750  | 1.105530  |
| 1  | -5.356504 | -0.919265 | -0.700253 |

16.  $\text{IrCl}(\text{CO})_2 - \mathbf{6}$  ( $\text{R} = \text{CH}_3$ ), T. E. = -1096.36474

|    |           |           |           |
|----|-----------|-----------|-----------|
| 6  | 3.297816  | -0.696668 | -0.589194 |
| 7  | 1.983785  | -0.920286 | -0.751730 |
| 6  | 1.220291  | 0.012689  | -0.017486 |
| 6  | 2.183391  | 0.798501  | 0.587860  |
| 7  | 3.446838  | 0.352431  | 0.225586  |
| 1  | 2.064612  | 1.638433  | 1.254644  |
| 1  | 4.100810  | -1.259454 | -1.040604 |
| 77 | -0.804142 | 0.059669  | -0.001581 |
| 17 | -3.206593 | 0.006779  | -0.344735 |



6 -0.889272 -1.538460 1.032638  
8 -0.941364 -2.406073 1.795678  
6 -0.789046 1.956039 -0.199058  
8 -0.777318 3.110629 -0.152632  
6 4.716978 0.927257 0.658553  
1 4.797058 0.870619 1.747594  
1 5.539102 0.367497 0.208236  
1 4.777239 1.972357 0.342858  
6 1.429630 -1.991508 -1.579121  
1 0.998516 -2.770719 -0.945429  
1 0.645283 -1.578528 -2.216190  
1 2.224754 -2.418470 -2.195362

17. IrCl(CO)<sub>2</sub> – 6 (R = Ph), T. E. = -1479.74070

6 -2.011090 1.335374 -0.225209  
7 -0.674715 1.174224 -0.210556  
6 -0.332080 -0.187211 0.012006  
6 -1.563825 -0.801580 0.123734  
7 -2.580227 0.140449 -0.020673  
1 -1.798602 -1.827901 0.355699  
1 -2.535150 2.250293 -0.451324  
77 1.551750 -0.911918 0.110952  
17 3.886163 -1.563677 -0.075911  
6 1.944258 0.122125 1.669912  
8 2.132075 0.604315 2.702868  
6 1.012368 -2.518257 -0.750122  
8 0.654449 -3.554980 -1.118314

|   |           |           |           |
|---|-----------|-----------|-----------|
| 6 | -3.989099 | -0.112511 | 0.014435  |
| 6 | -4.829517 | 0.734761  | 0.743252  |
| 6 | -6.203453 | 0.484783  | 0.761233  |
| 6 | -6.729057 | -0.612484 | 0.072889  |
| 6 | -5.876815 | -1.460770 | -0.640857 |
| 6 | -4.503448 | -1.212427 | -0.678978 |
| 1 | -4.411560 | 1.562645  | 1.308900  |
| 1 | -6.858825 | 1.139884  | 1.328114  |
| 1 | -7.797214 | -0.808465 | 0.096262  |
| 1 | -6.279982 | -2.313715 | -1.179215 |
| 1 | -3.839312 | -1.852946 | -1.251382 |
| 6 | 0.236159  | 2.267274  | -0.409724 |
| 6 | 0.085565  | 3.431029  | 0.350200  |
| 6 | 0.957935  | 4.502565  | 0.143095  |
| 6 | 1.979431  | 4.401741  | -0.805438 |
| 6 | 2.127148  | 3.228022  | -1.551225 |
| 6 | 1.253030  | 2.155940  | -1.362367 |
| 1 | -0.683165 | 3.485231  | 1.116332  |
| 1 | 0.849578  | 5.404966  | 0.738163  |
| 1 | 2.664997  | 5.230997  | -0.955880 |
| 1 | 2.926565  | 3.140337  | -2.281117 |
| 1 | 1.360459  | 1.241225  | -1.936186 |

18.  $\text{IrCl}(\text{CO})_2 - \mathbf{6}$  (R = <sup>t</sup>Bu), T. E. = -1332.08569

|   |          |           |           |
|---|----------|-----------|-----------|
| 6 | 2.544170 | 0.970820  | -0.000002 |
| 7 | 1.218242 | 1.206406  | -0.000072 |
| 6 | 0.516142 | -0.024595 | -0.000013 |

|    |           |           |           |
|----|-----------|-----------|-----------|
| 6  | 1.518271  | -0.968402 | 0.000061  |
| 7  | 2.761245  | -0.348603 | 0.000251  |
| 1  | 1.422979  | -2.041588 | 0.000205  |
| 1  | 3.313623  | 1.719863  | 0.000097  |
| 77 | -1.503895 | -0.337738 | -0.000051 |
| 17 | -3.935812 | -0.349528 | -0.000172 |
| 6  | -1.448029 | -0.835982 | -1.835180 |
| 8  | -1.375588 | -1.313136 | -2.887253 |
| 6  | -1.448787 | -0.835533 | 1.835260  |
| 8  | -1.377210 | -1.312456 | 2.887487  |
| 6  | 4.082701  | -1.052561 | 0.000189  |
| 6  | 0.615579  | 2.589238  | -0.000088 |
| 6  | 4.161990  | -1.920447 | -1.269447 |
| 1  | 4.081823  | -1.303690 | -2.171200 |
| 1  | 5.121653  | -2.447553 | -1.295408 |
| 1  | 3.365284  | -2.669970 | -1.296344 |
| 6  | 5.223667  | -0.025087 | 0.001418  |
| 1  | 6.177701  | -0.561001 | 0.001244  |
| 1  | 5.204587  | 0.610979  | -0.890874 |
| 1  | 5.203895  | 0.609525  | 0.894726  |
| 6  | 4.161148  | -1.922383 | 1.268553  |
| 1  | 5.120971  | -2.449201 | 1.294517  |
| 1  | 4.080013  | -1.307010 | 2.171155  |
| 1  | 3.364747  | -2.672280 | 1.293628  |
| 6  | -0.235505 | 2.755673  | -1.270237 |
| 1  | 0.373357  | 2.617219  | -2.171288 |
| 1  | -1.060786 | 2.037980  | -1.291919 |

|   |           |          |           |
|---|-----------|----------|-----------|
| 1 | -0.661880 | 3.764509 | -1.293220 |
| 6 | -0.235297 | 2.755720 | 1.270209  |
| 1 | -1.060345 | 2.037771 | 1.292229  |
| 1 | 0.373801  | 2.617641 | 2.171167  |
| 1 | -0.661972 | 3.764422 | 1.293055  |
| 6 | 1.731552  | 3.647871 | -0.000248 |
| 1 | 2.363078  | 3.588756 | -0.894558 |
| 1 | 1.263339  | 4.636630 | -0.000311 |
| 1 | 2.363184  | 3.588955 | 0.893995  |

**Table S1: Location of the  $\sigma$  Symmetric Lone Pair Orbital at the 'ene' Centre for the Molecules 1 - 6 and Their Respective Energies (eV) Calculated at B3LYP/6-31+G\* Level of Theory.**

| <b>Str. No.</b> | <b>R</b>              | <b>Location of <math>\sigma</math> symmetric lone pair at 'ene' centre</b> | <b>Energy (eV)</b> |
|-----------------|-----------------------|----------------------------------------------------------------------------|--------------------|
| <b>1</b>        | <b>H</b>              | HOMO                                                                       | -6.0               |
|                 | <b>F</b>              | HOMO                                                                       | -7.6               |
|                 | <b>Cl</b>             | HOMO                                                                       | -6.9               |
|                 | <b>OH</b>             | HOMO-2                                                                     | -7.2               |
|                 | <b>NH<sub>2</sub></b> | HOMO                                                                       | -6.1               |
|                 | <b>PH<sub>2</sub></b> | HOMO                                                                       | -6.1               |
|                 | <b>CH<sub>3</sub></b> | HOMO                                                                       | -5.8               |
|                 | <b>Ph</b>             | HOMO                                                                       | -6.1               |
|                 | <b><sup>t</sup>Bu</b> | HOMO                                                                       | -5.6               |
| <b>2</b>        | <b>H</b>              | HOMO                                                                       | -6.6               |
|                 | <b>F</b>              | HOMO                                                                       | -8.0               |
|                 | <b>Cl</b>             | HOMO                                                                       | -7.4               |
|                 | <b>OH</b>             | HOMO                                                                       | -7.3               |
|                 | <b>NH<sub>2</sub></b> | HOMO                                                                       | -6.6               |
|                 | <b>PH<sub>2</sub></b> | HOMO                                                                       | -6.5               |
|                 | <b>CH<sub>3</sub></b> | HOMO                                                                       | -6.3               |

---

|          |                       |        |      |
|----------|-----------------------|--------|------|
|          | <b>Ph</b>             | HOMO-1 | -6.6 |
|          | <b><sup>t</sup>Bu</b> | HOMO   | -6.0 |
| <b>3</b> | <b>H</b>              | HOMO   | -7.0 |
|          | <b>F</b>              | HOMO   | -7.9 |
|          | <b>Cl</b>             | HOMO-1 | -7.8 |
|          | <b>OH</b>             | HOMO-1 | -7.2 |
|          | <b>NH<sub>2</sub></b> | HOMO   | -6.6 |
|          | <b>PH<sub>2</sub></b> | HOMO   | -6.7 |
|          | <b>CH<sub>3</sub></b> | HOMO   | -6.5 |
|          | <b>Ph</b>             | HOMO-1 | -6.6 |
|          | <b><sup>t</sup>Bu</b> | HOMO   | -6.3 |
| <b>4</b> | <b>H</b>              | HOMO-1 | -6.7 |
|          | <b>F</b>              | HOMO-1 | -7.9 |
|          | <b>Cl</b>             | HOMO-2 | -7.6 |
|          | <b>OH</b>             | HOMO-1 | -7.2 |
|          | <b>NH<sub>2</sub></b> | HOMO-1 | -6.7 |
|          | <b>PH<sub>2</sub></b> | HOMO-1 | -6.9 |
|          | <b>CH<sub>3</sub></b> | HOMO-1 | -6.6 |
|          | <b>Ph</b>             | HOMO-2 | -6.8 |

---

---

|          |                       |        |      |
|----------|-----------------------|--------|------|
|          | <b>tBu</b>            | HOMO-1 | -6.2 |
| <b>5</b> | <b>H</b>              | HOMO-1 | -7.0 |
|          | <b>F</b>              | HOMO-2 | -8.2 |
|          | <b>Cl</b>             | HOMO-2 | -7.9 |
|          | <b>OH</b>             | HOMO-1 | -7.3 |
|          | <b>NH<sub>2</sub></b> | HOMO-1 | -6.8 |
|          | <b>PH<sub>2</sub></b> | HOMO-1 | -7.1 |
|          | <b>CH<sub>3</sub></b> | HOMO-1 | -6.8 |
|          | <b>Ph</b>             | HOMO-1 | -6.8 |
|          | <b>tBu</b>            | HOMO-1 | -6.4 |
| <b>6</b> | <b>H</b>              | HOMO   | -5.2 |
|          | <b>F</b>              | HOMO   | -6.8 |
|          | <b>Cl</b>             | HOMO   | -6.3 |
|          | <b>OH</b>             | HOMO   | -6.1 |
|          | <b>NH<sub>2</sub></b> | HOMO   | -5.4 |
|          | <b>PH<sub>2</sub></b> | HOMO   | -5.4 |
|          | <b>CH<sub>3</sub></b> | HOMO   | -5.0 |
|          | <b>Ph</b>             | HOMO   | -5.3 |
|          | <b>tBu</b>            | HOMO   | -4.8 |

---
